# Supplementary material for: Potential Efficacy of Bacillus coagulans BACO-17 to Modulate Gut Microbiota in Rats Fed High-Fat Diet
Source: MDPI journal article supplement (doi:10.3390/pr10122692), 2022-12-13
Supplement: s1 [file s1]

**Supplementary Table S1.** Composition of experimental diets.

|                              | Normal chow diet <sup>1</sup> | High fat diet |
|------------------------------|-------------------------------|---------------|
| Ingredient (g/100 g)         |                               |               |
| Chow                         | 100.0                         | 54.0          |
| Soybean oil                  | -                             | 4.8           |
| Condensed milk <sup>2</sup>  | -                             | 28.5          |
| Lard                         | -                             | 12.7          |
| Carbohydrate (%)             | 48.7                          | 41.7          |
| Fat (%)                      | 5.0                           | 22.5          |
| Protein (%)                  | 23.9                          | 15.0          |
| Energy <sup>3</sup> (kcal/g) | 3.4                           | 4.3           |

<sup>1</sup> Chow (PMI Nutrition International, St Louis, MO, USA) contained crude protein (23.9 g/100 g), crude lipid (5.0 g/100 g), and carbohydrate (48.7 g/100 g). <sup>2</sup> Condensed milk contained crude protein (7.3 g/100 g), crude lipid (8.2 g/100 g), and carbohydrate (54.5 g/100 g). <sup>3</sup> Energy (kcal/g) = (carbohydrate % ×4 + fat % ×9 + protein % ×4)/100.

(A)

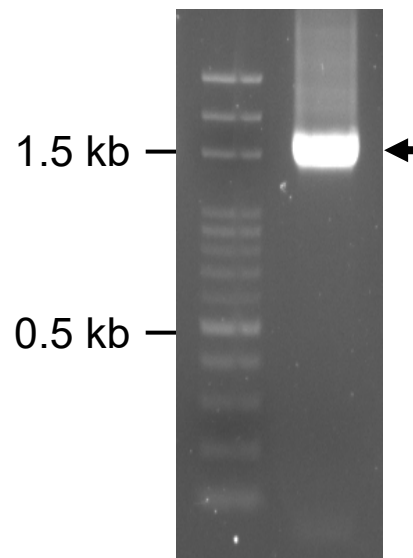

(B)

| Primer | Sequence                    | Reference |
|--------|-----------------------------|-----------|
| fD1    | 5'-AGAGTTTGATCCTGGCTCAG-3'  | [1]       |
| rP1    | 5'-ACGGTTACCTTGTTACGACTT-3' | [1]       |

**Supplementary Figure S1.** (A) Agarose gel electrophoresis of the amplified target of 16S rRNA gene from *Bacillus coagulans* BACO-17, and (B) the primers used for 16S rRNA gene analysis.

(A)

TGCAAGTCGTGCGGACCTTTTAAAAGCTTGCTTTTAAAAGGTTAGCGGCGGA  
CGGGTGAGTAACACGTGGGCAACCTGCCTGTAAGATCGGGATAACGCCGGG  
AAACCGGGGCTAATACCGGATAGTTTTTCTCCGCATGGAGGAAAAAGGA  
AAGACGGCTTCTGCTGTCACTTACAGATGGGCCCCGCGGCGCATTAGCTAGTT  
GGTGGGGTAACGGCTCACCAAGGCAACGATGCGTAGCCGACCTGAGAGGGT  
GATCGGCCACATTGGGACTGAGACACGGCCCAAACCTCCTACGGGAGGCAGC  
AGTAGGGAATCTTCCGCAATGGACGAAAGTCTGACGGAGCAACGCCGCGTG  
AGTGAAGAAGGCCTTCGGGTCGTAAAACCTCTGTTGCCGGGGAAGAACAAGT  
GCCGTTTCGAACAGGGCGGCGCCTTGACGGTACCCGGCCAGAAAGCCACGGC  
TAACTACGTGCCAGCAGCCGCGGTAATACGTAGGTGGCAAGCGTTGTCCGG  
AATTATTGGGCGTAAAGCGCGCGCAGGCGGCTTCTTAAGTCTGATGTGAAAT  
CTTGCGGCTCAACCGCAAGCGGTCATTGGAACTGGGAGGCTTGAGTGCAG  
AAGAGGAGAGTGGAATTCCACGTGTAGCGGTGAAATGCGTAGAGATGTGGA  
GGAACACCAGTGGCGAAGGCGGCTCTCTGGTCTGTAACCTGACGCTGAGGCG  
CGAAAGCGTGGGGAGCAAACAGGATTAGATACCCTGGTAGTCCACGCCGTA  
AACGATGAGTGCTAAGTGTTAGAGGGTTTCCGCCCTTTAGTGCTGCAGCTAA  
CGCATTAAGCACTCCGCCT

(B)

| Descriptions                                                                                                                                                                                  | Graphic Summary             | Alignments | Taxonomy    |             |         |            |          |                            |
|-----------------------------------------------------------------------------------------------------------------------------------------------------------------------------------------------|-----------------------------|------------|-------------|-------------|---------|------------|----------|----------------------------|
| Sequences producing significant alignments                                                                                                                                                    |                             |            |             |             |         |            |          |                            |
| Download <span>▼</span> Select columns <span>▼</span> Show <span>100</span> <span>▼</span>               |                             |            |             |             |         |            |          |                            |
| <input checked="" type="checkbox"/> select all    100 sequences selected <a href="#">GenBank</a> <a href="#">Graphics</a> <a href="#">Distance tree of results</a> <a href="#">MSA Viewer</a> |                             |            |             |             |         |            |          |                            |
| Description                                                                                                                                                                                   | Scientific Name             | Max Score  | Total Score | Query Cover | E value | Per. Ident | Acc. Len | Accession                  |
| <input checked="" type="checkbox"/> <a href="#">Weizmannia coagulans strain 1903 16S ribosomal RNA gene, partial...</a>                                                                       | <a href="#">Weizmann...</a> | 1550       | 1550        | 100%        | 0.0     | 100.00%    | 1462     | <a href="#">MT626076.1</a> |
| <input checked="" type="checkbox"/> <a href="#">Weizmannia coagulans strain 2274 16S ribosomal RNA gene, partial...</a>                                                                       | <a href="#">Weizmann...</a> | 1550       | 1550        | 100%        | 0.0     | 100.00%    | 1442     | <a href="#">MT604752.1</a> |
| <input checked="" type="checkbox"/> <a href="#">Weizmannia coagulans strain 683 16S ribosomal RNA gene, partial s...</a>                                                                      | <a href="#">Weizmann...</a> | 1550       | 1550        | 100%        | 0.0     | 100.00%    | 1463     | <a href="#">MT585444.1</a> |
| <input checked="" type="checkbox"/> <a href="#">Weizmannia coagulans strain 1233 16S ribosomal RNA gene, partial...</a>                                                                       | <a href="#">Weizmann...</a> | 1550       | 1550        | 100%        | 0.0     | 100.00%    | 1454     | <a href="#">MT573683.1</a> |
| <input checked="" type="checkbox"/> <a href="#">Weizmannia coagulans strain 573 16S ribosomal RNA gene, partial s...</a>                                                                      | <a href="#">Weizmann...</a> | 1550       | 1550        | 100%        | 0.0     | 100.00%    | 1440     | <a href="#">MT573133.1</a> |
| <input checked="" type="checkbox"/> <a href="#">Weizmannia coagulans strain 4093 16S ribosomal RNA gene, partial...</a>                                                                       | <a href="#">Weizmann...</a> | 1550       | 1550        | 100%        | 0.0     | 100.00%    | 1455     | <a href="#">MT544672.1</a> |
| <input checked="" type="checkbox"/> <a href="#">Weizmannia coagulans strain 8177 16S ribosomal RNA gene, partial...</a>                                                                       | <a href="#">Weizmann...</a> | 1550       | 1550        | 100%        | 0.0     | 100.00%    | 1440     | <a href="#">MT538925.1</a> |
| <input checked="" type="checkbox"/> <a href="#">Weizmannia coagulans strain 7163 16S ribosomal RNA gene, partial...</a>                                                                       | <a href="#">Weizmann...</a> | 1550       | 1550        | 100%        | 0.0     | 100.00%    | 1418     | <a href="#">MT516014.1</a> |
| <input checked="" type="checkbox"/> <a href="#">Weizmannia coagulans strain 6911 16S ribosomal RNA gene, partial...</a>                                                                       | <a href="#">Weizmann...</a> | 1550       | 1550        | 100%        | 0.0     | 100.00%    | 1417     | <a href="#">MT463969.1</a> |
| <input checked="" type="checkbox"/> <a href="#">Weizmannia coagulans strain 6593 16S ribosomal RNA gene, partial...</a>                                                                       | <a href="#">Weizmann...</a> | 1550       | 1550        | 100%        | 0.0     | 100.00%    | 1457     | <a href="#">MT463837.1</a> |

note: *Weizmannia coagulans* is the validated name of *Bacillus coagulans*.

**Supplementary Figure S2.** Bacterial identification of *Bacillus coagulans* BACO-17. (A)

Partial sequence of 16S rRNA gene, and (B) top listed BLAST results.

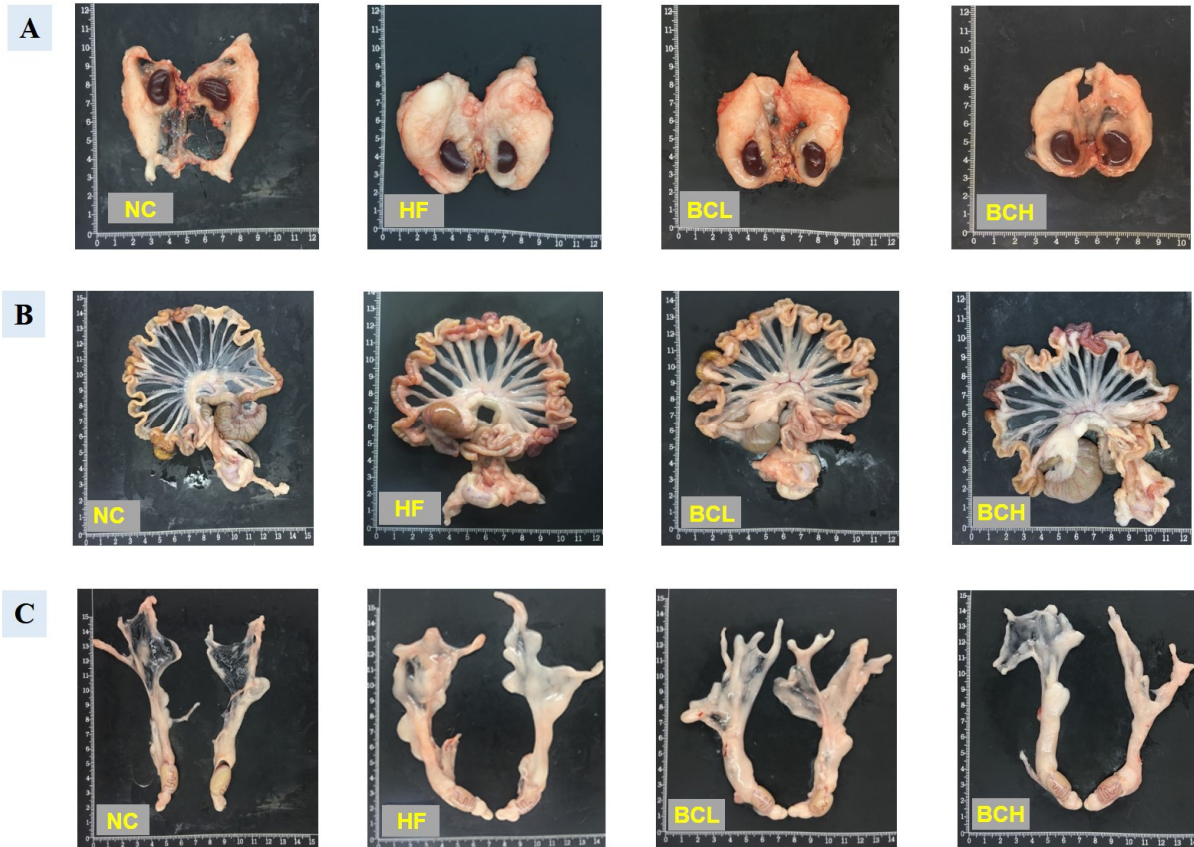

**Supplementary Figure S3.** Visceral fat mass (A) perirenal fat, (B) mesenteric fat, and (C) epididymal fat among different groups.

## References

1. Weisburg, W. G.; Barns, S. M.; Pelletier, D. A.; Lane, D. J. 16S ribosomal DNA amplification for phylogenetic study. *J. Bacteriol.* **1991**, *173*, 697-703, doi: 10.1128/jb.173.2.697-703.1991.
